# Supplementary material for: Unpacking Barriers to Integrated Adolescent Health Services: Insight from Primary Care Implementation in Low Resource Settings”
Source: Research Square preprint supplement (doi:10.21203/rs.3.rs-8363565/v1), 2026-01-05
Supplement: Supplementary file 1 [file ca19f361032fd7bfdde6f151.pdf]

## **IN-DEPTH INTERVIEW GUIDE**

### **IDENTIFICATION OF FACILITATING AND INHIBITING FACTORS OF ADOLESCENT HEALTH SERVICE IN THE IMPLEMENTATION OF INTEGRATED PRIMARY CARE**

#### **A. Target Informants**

1. Adolescent Health Program Managers
2. Primary Health Care Providers (Doctors, Midwives, Nurses)
3. Policy Makers at Primary Health Care Centers and District Health Offices
4. Coordinators of the Integrated Primary Care Program

#### **B. Preparation**

1. Contacting informants to confirm their willingness, interview schedule, and location
2. Preparing Interview equipment, such as audio recorders, and ensuring they function properly
3. Maintaining appropriate and respectful appearance as a form of respect toward informants

#### **C. Interview Procedure**

1. Greeting the informant and expressing appreciation for their willingness to participate in the interview
2. Introducing the interviewer
3. Providing a brief explanation of the background and objectives of the study
4. Explaining that the interview results are solely for research purposes
5. Clarifying that all answers, comments, and information provided are valuable and that there are No. right or wrong answers
6. Assuring the informant that all interview data and respondent identities will be kept confidential
7. Requesting the informant to provide honest and accurate answers, comments, and information.
8. Expressing gratitude at the end of the interview and requesting permission to contact the informant again if further data are needed.

#### **B. Respondent Identity**

1. Day/Date :
2. Time :

3. Location :
4. Respondent ID :
5. Sex :
6. Age :
7. Highest Educational Level :
8. Length of Employment :
9. Position :

### C. Interview Guide

| No | Variabel                            | Pertanyaan                                                                                                                                                                                                    |
|----|-------------------------------------|---------------------------------------------------------------------------------------------------------------------------------------------------------------------------------------------------------------|
| 1  | Cognitive factors                   | In your opinion, are adolescent health services important?<br>(Probing: adolescent health problems, service delivery settings, types of services, and service objectives)                                     |
|    | Knowledge                           | In your opinion, what adolescent health services should be provided?<br>(Probing: service packages and service schedules)                                                                                     |
|    | Attitudes                           | In your opinion, what types of attitudes or behaviors can lead to health problems among adolescents?                                                                                                          |
|    | Beliefs                             | In your opinion, do the current adolescent health services help adolescents address their health problems?                                                                                                    |
| 2  | Behavioral Factors                  | How often do you provide health services, either at primary health care centers or outside the facility?                                                                                                      |
|    | Use of Health Services              | What are the main reasons adolescents use or do not use health services?<br>(Probing: consultation, counseling, information, education and communication activities, screening, and needs-based examinations) |
|    | Adherence to Health Recommendations | Do adolescents follow the advice or recommendations provided by health workers after receiving services?                                                                                                      |

|   |                                                   |                                                                                                                                                                                                                        |
|---|---------------------------------------------------|------------------------------------------------------------------------------------------------------------------------------------------------------------------------------------------------------------------------|
|   | Health Information-Seeking Behavior               | In your opinion, do adolescents prefer to seek health information independently or consult health professionals? Why?                                                                                                  |
| 3 | Environmental Factors                             | In your opinion, what environmental factors support or hinder adolescent health services?                                                                                                                              |
|   | Regulations/Policies                              | In your opinion, what types of regulations or policies support or hinder adolescent health services?<br><i>(Probing at the family, school, and community levels)</i>                                                   |
|   | Community and Society                             | In your opinion, what types of community characteristics support or hinder adolescents in utilizing health service facilities?                                                                                         |
|   | Family Support                                    | In your opinion, what types of family support facilitate or hinder adolescents in utilizing health services?                                                                                                           |
|   | Availability and Accessibility of Health Services | In your opinion, do distance to facilities and service costs serve as facilitating or inhibiting factors for adolescent health services?                                                                               |
|   | Peers                                             | In your opinion, what types of peer influences support or hinder adolescents in utilizing health services?                                                                                                             |
|   | Health Service Facilities                         | In your opinion, what types of facilities support or hinder adolescent health services?                                                                                                                                |
|   | Health Care Providers                             | In your opinion, what characteristics of health care providers support or hinder adolescent health services?                                                                                                           |
|   | Norms and Culture                                 | In your opinion, what social norms and cultural values serve as facilitating or inhibiting factors for adolescent health services?                                                                                     |
| 4 | Impact and Improvement Efforts                    | How do these barriers affect the quality and accessibility of adolescent health services?<br><br>In your opinion, what strategies can be implemented to improve the delivery of integrated adolescent health services? |

---

|   |         |                                                                                                                                    |
|---|---------|------------------------------------------------------------------------------------------------------------------------------------|
| 5 | Closing | Is there anything else you would like to share regarding adolescent health services within the context of Integrated Primary Care? |
|---|---------|------------------------------------------------------------------------------------------------------------------------------------|

---

## **FOCUS GROUP DISCUSSION (FGD) GUIDE**

### **IDENTIFICATION OF FACILITATING AND INHIBITING FACTORS OF ADOLESCENT HEALTH SERVICE IN THE IMPLEMENTATION OF INTEGRATED PRIMARY CARE**

#### **A. Target Informants**

1. Adolescent

#### **B. Preparation**

1. Contacting participants (parents/guardians if consent is required) to confirm their willingness, interview schedule, and location
2. Preparing supporting equipment for the discussion, such as audio recorders, and ensuring they function properly
3. Maintaining appropriate and respectful appearance as a form of respect toward participants

#### **C. Implementation Procedure**

1. Greeting the participants and expressing appreciation for their willingness to participate in the discussion
2. Introducing the moderator and research team
3. Providing a brief explanation of the background and objectives of the study
4. Explaining that the discussion is conducted solely for research purposes
5. Clarifying that participant's responses, comments, and shared information are valuable and that there are no right or wrong answers
6. Assuring participants to respond honestly and openly based on their own experiences
9. At the end the discussion, thank participants and request permission to contact them again if additional information is needed.

#### D. Participant Characteristics

- 1 Day/Date :
- 2 Time :
- 3 Location :
- 4 Respondent ID :
- 5 Sex :
- 6 Age :
- 7 Education Level : \_\_\_\_\_ (Junior/Senior/vocational high school/Equivalent)
- 8 Status : \_\_\_\_\_ (In school/ Out of school)
- 9 Previous use of adolescent health service : \_\_\_\_\_ (Yes/No)

#### E. Panduan Pertanyaan

| No | Variabel                                      | Pertanyaan                                                                                                                                                                                                       |
|----|-----------------------------------------------|------------------------------------------------------------------------------------------------------------------------------------------------------------------------------------------------------------------|
| 1  | Cognitive factors                             | In your opinion, is adolescent health important? Why?<br><br><i>Moderator probe: Do all participants agree? Are there different views?</i>                                                                       |
|    | Knowledge                                     | What types of health services do you think adolescents should receive?<br><i>(Probing: service packages, service hours, types of services)</i>                                                                   |
|    | Attitudes                                     | According to the group, what attitudes or behaviors among adolescents may lead to health problems?                                                                                                               |
|    | Beliefs                                       | Do you think the existing adolescent health services are able to help adolescent address their health problems?<br><br><i>Moderator probe: What experiences or stories are commonly shared among your peers?</i> |
| 2  | Behavioral Factors                            | How often do adolescents utilize health services at primary health centers or outside primary health facilities?                                                                                                 |
|    | Reasons for Use or Non-Use of Health Services | What are the main reasons adolescents use or do not use adolescent health services?<br><i>(Probing: consultation, counseling,</i>                                                                                |

---

|                                                   |                                                                                                                                       |
|---------------------------------------------------|---------------------------------------------------------------------------------------------------------------------------------------|
|                                                   | <i>information, education and communication activities, screening, and needs-based examinations)</i>                                  |
| Adherence to Health Recommendations               | After receiving services, do adolescents usually follow the advice or recommendations provided by health workers?                     |
|                                                   | <i>Moderator probe: Why do some adolescents comply while others do not?</i>                                                           |
| Health Information-Seeking Behavior               | According to the group, do adolescents tend to seek health information independently or consult health professionals more often? Why? |
| 3 Environmental Factors                           | What environmental factors do you think support or hinder adolescents in utilizing health services?                                   |
| Regulations/Policies                              | Why types of rules or policies at the family, school, or community level support or hinder adolescent health services?                |
| Community and Society                             | How does the community generally perceive adolescents from accessing health services?                                                 |
| Family Support                                    | What kinds of family support facilitate or hinder adolescents from accessing health services?                                         |
| Availability and Accessibility of Health Services | Do distance to health facilities, service costs, or service hours pose barriers for adolescents?                                      |
| Peers influence                                   | How do peers influence adolescents decisions to seek or not seek health services?                                                     |
| Health Service Facilities                         | What types of health facility environments make adolescents feel comfortable or uncomfortable?                                        |
| Health Care Providers                             | What characteristics of health workers support or hinder adolescents in accessing health services?                                    |

---

---

|   |                                |                                                                                                                                                                                                                                                  |
|---|--------------------------------|--------------------------------------------------------------------------------------------------------------------------------------------------------------------------------------------------------------------------------------------------|
|   | Norms and Culture              | What social norms and cultural factors do you think most strongly influence the utilization of adolescent health services?                                                                                                                       |
| 4 | Impact and Improvement Efforts | <p>In your opinion, how do the barriers affect the quality and accessibility of adolescent health services?</p> <p>What strategies do you think could be implemented to make integrated health services more accessible and better utilized?</p> |
| 5 | Closing                        | Is there anything else you would like to share regarding adolescent health services within the context of Integrated Primary Care?                                                                                                               |

---
